1 High risk landscapes of Japanese encephalitis virus outbreaks in India converge on wetlands, rainfed  
2 agriculture, wild Ardeidae, and domestic pigs

3 Michael G. Walsh<sup>1,2,3,4</sup>, Amrita Pattanaik<sup>5</sup>, Navya Vyas<sup>3,4</sup>, Deepak Saxena<sup>6</sup>, Cameron Webb<sup>2,7</sup>, Shailendra  
4 Sawleshwarkar<sup>2,3,4,8</sup>, Chiranjay Mukhopadhyay<sup>9,10</sup>

5 <sup>1</sup>The University of Sydney, Faculty of Medicine and Health, School of Public Health, Camperdown, New  
6 South Wales, Australia, <sup>2</sup>The University of Sydney, Faculty of Medicine and Health, Sydney Institute for  
7 Infectious Diseases, Westmead, New South Wales, Australia, <sup>3</sup>One Health Centre, The Prasanna School  
8 of Public Health, Manipal Academy of Higher Education, Manipal, Karnataka, India, <sup>4</sup>The Prasanna School  
9 of Public Health, Manipal Academy of Higher Education, Manipal, Karnataka, India, <sup>5</sup>Manipal Institute of  
10 Virology, Manipal Academy of Higher Education, Manipal, Karnataka, India, <sup>6</sup>Department of  
11 Epidemiology, Indian Institute of Public Health Gandhinagar, Gandhinagar, Gujarat, India, <sup>7</sup>Department  
12 of Medical Entomology, NSW Health Pathology, Westmead Hospital, Westmead, New South Wales,  
13 Australia <sup>8</sup>The University of Sydney, Faculty of Medicine and Health, Westmead Clinical School,  
14 Westmead, New South Wales, Australia, <sup>9</sup>Department of Microbiology, Kasturba Medical College,  
15 Manipal Academy of Higher Education, Manipal, Karnataka, India, <sup>10</sup>Centre for Emerging and Tropical  
16 Diseases, Kasturba Medical College, Manipal Academy of Higher Education, Manipal, Karnataka, India

17

18

19

20

21

22

23

24

25

26

27 \*Address correspondence to:  
28 Michael Walsh, PhD, MPH  
29 Senior Lecturer, Infectious Diseases Epidemiology  
30 Marie Bashir Institute for Infectious Diseases and Biosecurity  
31 Sydney School of Public Health  
32 The University of Sydney  
33 176 Hawkesbury Road  
34 Westmead NSW 2145 Australia  
35 thegowda@gmail.com  
36 michael.walsh1@sydney.edu.au

37

38 Abstract

39 Japanese encephalitis constitutes a significant burden of disease across Asia, particularly in India, with  
40 high mortality in children. This zoonotic mosquito-borne disease is caused by the *Flavivirus*, Japanese  
41 encephalitis virus (JEV), and circulates in wild ardeid bird and domestic pig reservoirs both of which  
42 generate sufficiently high viremias to infect vector mosquitoes, which can then subsequently infect  
43 humans. The landscapes of these hosts, particularly in the context of anthropogenic ecotones and  
44 resulting wildlife-livestock interfaces, are poorly understood and thus significant knowledge gaps in the  
45 epidemiology and infection ecology of JEV persist, which impede optimal control and prevention of  
46 outbreaks. The current study investigated the landscape epidemiology of JEV outbreaks in India over the  
47 period 2010 to 2020 based on national human disease surveillance data. Outbreaks were modelled as an  
48 inhomogeneous Poisson point process. Outbreak risk was strongly associated with the habitat suitability  
49 of ardeid birds and pig density, and shared landscapes between fragmented rainfed agriculture and both  
50 river and freshwater marsh wetlands. Moreover, risk scaled with Ardeidae habitat suitability, but was  
51 consistent across scale with respect to pig density and rainfed agriculture-wetland mosaics. The results  
52 from this work provide a more complete understanding of the landscape epidemiology and infection  
53 ecology of JEV in India and suggest important priorities for control and prevention across fragmented  
54 terrain comprised of wildlife-livestock interface that favours spillover to humans.

55

56

57

58

59

60

61

62

63

64

65

66

67

68

69

70

71

72 Introduction

73 Japanese encephalitis virus (JEV) is one of the most substantial causes of childhood encephalitis in  
74 Asia(1). While most infections are asymptomatic or mild (approximately 1 in 250 infections present with  
75 severe clinical disease), mortality is high among those presenting with encephalitis(1). In India, a country  
76 with a high burden of disease caused by JEV, 13.7% of 63,854 acute encephalitis cases from 2010 to  
77 2017 were due to JEV and over 17% of these cases died(2). Although the annual occurrence of Japanese  
78 encephalitis (JE) is high, there is considerable heterogeneity in its occurrence across the country with the  
79 northeast being a perennial hotspot for outbreaks, although additional far-removed areas of intractable  
80 endemicity also persist(2). Japanese encephalitis virus is a mosquito-borne zoonotic *Flavivirus* with  
81 enzootic and endemic transmission in animal and human hosts, respectively, although such baseline  
82 transmission is regularly punctuated with more substantial outbreaks(3,4). Outbreaks in India are  
83 generally seasonal following monsoon flooding, but transmission can and does happen at any time of  
84 the year with rural populations typically at highest risk although some urban locations also experience  
85 outbreaks(2).

86 The infection ecology of JEV is complex and incompletely understood in many landscapes. As a  
87 result, viral transmission is often poorly controlled. *Culex tritaeniorhynchus* is the most important vector  
88 for JEV across Asia(4,5) and has a wide distribution in India(5,6). In addition to this highly efficient  
89 vector, there are at least four other important vectors (*Cx. vishnui*, *Cx. gelidus*, *Cx. fuscocephala*, and *Cx.*  
90 *pseudovishnui*) that also exhibit wide distribution across South and Northeast India(6,7). Given the wide  
91 range of suitable habitats for these mosquitoes, exposure to JEV vectors is extensive throughout the  
92 country. Wading bird species in the Ardeidae family are the primary reservoirs and maintenance hosts  
93 for JEV(8–11), while domestic pigs are key amplifying hosts that frequently accelerate spillover to  
94 humans(12–17). This general distinction between host groups notwithstanding, high viremias have been  
95 shown in several Ardeidae species, so these maintenance hosts may also simultaneously act as

96 amplifying hosts depending on the nature of their interface with humans or pigs(4). Moreover, some  
97 heron species can readily adapt to some agricultural practices (e.g. rice paddies), increasing contact  
98 between people and domestic animals in these settings(18). Interestingly, specific maintenance host-  
99 mosquito vector-amplifying host interactions have been identified showing *Cx. tritaeniorhynchus*  
100 zoophilic feeding preferences for herons and domestic pigs, which may further highlight the importance  
101 of interface and the potential for an efficient bridge to human spillover in landscapes that favour these  
102 interactions(4).

103         The biotic factors described above define the vectors and hosts in which JEV circulates and the  
104 nature of interspecies interaction that may drive viral transmission dynamics in hosts, but there are  
105 equally important abiotic factors that can influence JEV transmission such as wetlands and rainfed  
106 agriculture. Heterogenous wetlands not only provide a spectrum of favourable habitat for vectors, they  
107 also demarcate critical habitat for key ardeid reservoirs(19). Rainfed agricultural mosaics tend to  
108 comprise agricultural systems that 1) are engaged by poorer, subsistence communities, and 2) exhibit  
109 far less control of water distribution in the landscape(20). Both wetland habitat and rainfed mosaics can  
110 influence mosquito habitats by way of their distribution of water in the landscape, and, since both  
111 landscapes can be sensitive to the modulating effects of climate, these could represent important vector  
112 foci(21). Moreover, rainfed crop mosaics that lie within or adjacent to wetland habitat may present  
113 ecotones of particular risk since these often also present landscapes occupied by key animal hosts and  
114 may therefore exhibit multiplicities of JEV transmission (Figure 1). In India, while some states have been  
115 recognised as hotspots of annual JEV outbreaks, the landscape epidemiology of JEV has not been  
116 thoroughly described in these and other areas of occurrence. The heterogeneity of risk is particularly  
117 noteworthy since viable mosquito vectors can be found in most parts of the country. As such, the  
118 delineation of JEV outbreak risk across India requires a broader consideration of diverse landscapes,  
119 which represent mosaics of wetland habitat, rainfed agriculture, and animal hosts (Figure 1).

120 Finally, a complete understanding of the epidemiology and infection ecology of JEV requires an  
121 understanding of the differential scaling of biotic and abiotic drivers of JEV activity across landscapes.  
122 There is some evidence to suggest that biotic interactions between organisms, and abiotic interactions  
123 between organisms and their environment (or environmental filtering), may scale differently with  
124 respect to some ecological relationships, particularly with respect to pathogen transmission (22). Under  
125 this framework, biotic interactions may dominate at more local scale, whereas abiotic interactions can  
126 exhibit greater influence at broader scale. However, there is considerable variation with respect to such  
127 phenomena, wherein some relationships may show consistency across scale or may show the reverse  
128 between biotic and abiotic feature dominance at scale(23). The scaling of risk is an added dimension of  
129 JEV epidemiology that has gone unexplored and represents a further critical knowledge gap. Because  
130 the scaling of associations may have consequences for epidemiological and ecological inference, or the  
131 scale of interventions that may be deployed as a result, it is necessary to examine how associations  
132 between biotic and abiotic features may scale differently.

133 The current study sought to identify the key landscape features of JEV outbreaks in India. In  
134 particular, this investigation examined the associations between JEV occurrence in humans and the  
135 distribution of maintenance and amplifying animal hosts, wetland hydrogeography and flow dynamics,  
136 rainfed agriculture, and climate. These associations were further interrogated at both local and broad  
137 scale to determine whether JEV risk scales differently for biotic and abiotic landscape features. While  
138 considerable heterogeneity in risk was anticipated, it was hypothesised that river wetlands and rainfed  
139 agriculture with high pig density and high Ardeidae suitability would drive the landscape epidemiology  
140 of JEV.

141

142

143

144 Methods

145 Data sources

146 The National Centre for Disease Control's Integrated Disease Surveillance Programme (IDSP)  
147 maintains ongoing surveillance of JEV infections under the administration of India's Ministry of Health  
148 and Family Welfare(24). There were 294 laboratory-confirmed and location-unique outbreaks of JEV  
149 reported at village level (spatial resolution of 1 arc minute, or approximately 2 km) to the IDSP between  
150 1 January, 2010 and 31 December, 2020. These were included as the primary training data in the current  
151 study. As a test of the external validity of these surveillance data, a secondary dataset (n = 27)  
152 comprising all available independent, laboratory-confirmed community surveys of human and mosquito  
153 infection conducted within the same time period as the IDSP surveillance and with published location  
154 data were used to test the performance of models trained with the IDSP surveillance data(25–28).

155 JE infections often disproportionately affect communities of lower socioeconomic status with  
156 limited access to health care, so this study adjusted for potential reporting bias of JEV infections using  
157 the distribution of health system performance as a representation of the local capacity to detect cases  
158 (see modelling description below). The infant mortality ratio (IMR) was chosen as a proxy for health  
159 system performance since it has been validated as representative of health infrastructure and health  
160 system performance and used to assess health service delivery and performance in diverse  
161 settings(29,30). Moreover, the IMR is correlated with the Inequality-Adjusted Human Development  
162 Index (IHDI) and the Human Development Index (HDI) and is therefore an important representation of  
163 the economic, social, and environmental structural determinants of population health(29,31). The raster  
164 of the IMR was obtained from the Socioeconomic Data and Applications Center (SEDAC) repository(32).  
165 Human population density was derived from the Global Rural-Urban Mapping Project estimates for the  
166 2010 population(33) to represent the baseline population at the beginning of the period under study.  
167 The raster data product was obtained from the SEDAC repository.

168 The Global Biodiversity Information Facility (GBIF) was used to acquire all observations of  
169 Ardeidae species (241,784 individual observations of 15 species) between 1 January 2010 and 31  
170 December 2020 across India so each species' distribution could be modelled(34). Pig density data were  
171 obtained from the Gridded Livestock of the World(35) (GLW). While pigs have been demonstrated  
172 as key amplifying hosts for JEV, some evidence suggests that poultry may also act as bridging hosts to  
173 human spillover in some settings(11,36,37), so we additionally included poultry density in these analyses  
174 obtained from the same GLW source. For some regions of the world these data demonstrate non-  
175 negligible spatial heterogeneity in error. However in India, the estimates were adjusted by animal  
176 censuses at the 2nd and 3rd stage administration levels, corresponding to the district and taluk,  
177 respectively, which represented a high level of data verification at a sub-state scale(35).

178 Due to potential differential accessibility, the background points used to model Ardeidae species  
179 distributions were weighted by the human footprint (HFP) (see modelling description below) to correct  
180 for potential spatial reporting bias in the observations of these birds. Human footprint raster data were  
181 acquired from the SEDAC registry(38) and quantified according to a 2-stage classification system(39).  
182 First, a metric for human influence was constructed based on the following eight categories: (1)  
183 population density, (2) road proximity, (3) rail line proximity, (4) navigable river proximity, (5) coastline  
184 proximity, (6) artificial light at night, (7) rural versus urban location, and (8) land cover. These categories  
185 were scored and summed to generate the human influence index (HII), which ranges from 0 (absence of  
186 human impact) to 64 (maximum human impact). The ratio of the range of minimum and maximum HII in  
187 the local terrestrial biome to the range of minimum and maximum HII across all biomes, expressed as a  
188 percentage, is then calculated to produce the HFP metric(39).

189 The structure of water movement through the landscape was quantified using hydrological flow  
190 accumulation obtained from the Hydrological Data and Maps based on SHuttle Elevation Derivatives at  
191 multiple Scales (HydroSHEDS) information system (<https://hydrosheds.cr.usgs.gov/>), which is derived

192 from elevation data of the Shuttle Radar Topography Mission(40). Hydrological flow accumulation  
193 measures the quantity of upland area draining into each 500 × 500 m area.

194 Wetlands were classified using the surface water data from the Global Lakes and Wetlands  
195 Database(41). Wetland types represented in the current study comprised: coastal wetland, river,  
196 controlled water reservoir, lake, freshwater marsh, swamp, or intermittent wetland(42). To quantify  
197 proximity to each wetland type, the proximity function in the QGIS geographic information system was  
198 used to create distance rasters for each wetland class(43). The pixel values of these rasters represent  
199 the distance in kilometres between each wetland type and all other pixels within the geographic extent  
200 under study. The distance rasters were then used to investigate the relationships between distinct  
201 wetland environments and JEV outbreaks.

202 Agriculture data were obtained from the Global Food Security Support Analysis Data (GFSAD)  
203 project to describe the geographic extent of crops that employ rainfed water distribution systems at a  
204 resolution of 30 arc seconds(44). Two primary classes of rainfed agricultural systems were represented:  
205 dominant rainfed crops and fragmented rainfed crop mosaics. A third class, highly fragmented rainfed  
206 crop mosaics, was also available but was highly correlated and exhibited considerable overlap with  
207 fragmented mosaics and yielded very similar relationships, so this class was considered redundant and  
208 not included in this investigation. As with the wetland classes described above, distance rasters were  
209 created for both the dominant rainfed crop and fragmented rainfed crop classes using the proximity  
210 function in QGIS.

211 Climate data were obtained from the WorldClim Global Climate database(45). This investigation  
212 examined seasonal measures of precipitation due to the distinct seasonal pattern in JEV outbreaks, as  
213 particularly marked by monsoon-associated precipitation. Accordingly, rasters for the mean driest  
214 quarter precipitation and wettest quarter precipitation, as well as the mean annual temperature, were  
215 used in this analysis.



216 Statistical Analyses

217 *Ardeidae species distribution modelling.* An ensemble approach comprising both boosted  
218 regression trees (BRT) and random forests (RF) models was used to estimate the landscape suitability of  
219 each of the 15 Ardeidae species. Species distribution models (SDMs) based on these machine learning  
220 frameworks partition the data space according to algorithms that optimise homogeneity among  
221 predictors and a response (e.g. species presence), whereby optimised decision trees are iteratively  
222 determined and can capture complex interactions between predictors(46–49). Each SDM under the two  
223 distinct modelling frameworks (BRT and RF) was fit using five-fold cross-validation. To prevent artificial  
224 spatial clustering of observation data, the data were thinned to include only one observation per pixel in  
225 the analysis (S1 Table 1). Mean annual precipitation, mean annual temperature, isothermality, and  
226 proximity to surface water comprised the environmental features included in the SDMs. These variables  
227 exhibited low correlation with each other (all Pearson's  $r < 0.5$ ) and therefore their inclusion together in  
228 the models was justified. Model performance, based on the area under the receiver operating  
229 characteristic curve (AUC), and model fit, based on the deviance, were used to evaluate each of the two  
230 SDM frameworks (BRT and RF) for each ardeid species. Subsequently, an ensemble landscape suitability  
231 was estimated for each species from the two SDM frameworks using their weighted mean, with weights  
232 based on AUC(50). Potential spatial sampling bias in the GBIF database was adjusted for by sampling  
233 background points proportional to the human footprint as a proxy for landscape accessibility. The  
234 landscape suitability for each species was modelled at a spatial resolution of 30 arc seconds (~1 km).  
235 Individual species are presented with their number of field observations (and thinned analytical  
236 observations) and model metrics in S1 Table 1.

237 After modelling the distributions of individual Ardeidae species' landscape suitability, a  
238 composite of ardeid suitability was calculated based on the mean of all individual species suitability  
239 distributions. The degree of niche overlap(51) between each individual species landscape suitability and

240 the composite species suitability was evaluated to determine the extent of heterogeneity between the  
241 species-specific environmental niches. More specifically, niche overlap was assessed to determine (1) if  
242 heterogeneity was too extensive to justify a composite representation of Ardeidae species landscape  
243 suitability, (2) if a small number of ardeid species demonstrating divergent landscape suitability should  
244 be considered individually in concert with a composite representation of landscape suitability for the  
245 remaining species, or (3) if the species demonstrated sufficient overlap in their environmental niches to  
246 justify a composite representation of Ardeidae species landscape suitability alone. The sdm package(50)  
247 in the R platform(52) was used for fitting each model and the derivation of the two-model ensembles to  
248 each species and the dismo package was used to compare niche overlap(53).

249 *JEV outbreak modelling.* The JEV outbreaks were fitted as a point process using homogeneous  
250 and inhomogeneous Poisson models(54). This framework allows for the assessment of spatial  
251 dependencies among the outbreaks and, where such dependencies are identified, these can be  
252 evaluated with respect to environmental features that may account for the observed dependencies.

253 First, JEV outbreaks were fitted as a homogeneous Poisson process, with conditional intensity,

$$254 \lambda(u,X) = \beta, \quad (1)$$

255 where  $u$  designates the geographic locations of outbreaks,  $X$ , and  $\beta$  represents the intensity parameter.

256 Intensity is defined as the number of points in a subregion of a defined geographic extent. The  
257 homogeneous Poisson model is the null model representing complete spatial randomness (CSR). Under  
258 CSR, the expected intensity is proportional to the area of the subregion under consideration(54), i.e.,  
259 there is no spatial dependency.

260 Second, the model with the assumption of CSR was compared to an inhomogeneous Poisson  
261 process, which incorporates spatial dependency of the outcome (JEV outbreaks) into the model  
262 structure and has conditional intensity,

$$263 \lambda(u,X) = \beta(u). \quad (2)$$

264 With this model, the intensity is represented as a function of the location,  $u$ , of the JEV  
265 outbreaks. The inhomogeneous Poisson model supported substantive spatial dependency in JEV  
266 outbreak intensity as this was a markedly better fit than the CSR model and also demonstrated  
267 significant divergence from CSR in the K-function (see results below). Given the identified spatial  
268 dependence in JEV outbreaks, simple and multiple inhomogeneous Poisson models with environmental  
269 features were fitted with conditional intensity,

$$270 \lambda(u, X) = \rho(Z(u)), \quad (3)$$

271 where  $\rho$  is the parameter representing the association between the point intensity and the feature  $Z$  at  
272 location  $u$ . The models' background points were sampled proportional to IMR, as described above, to  
273 control for potential reporting bias in the JEV infection surveillance.

274 As above for the SDMs, the outbreak occurrences were thinned to prevent over-fitting of the  
275 models. The data were thinned so that no more than one event was included within each pixel under  
276 the two spatial scales investigated at 1.0 and 10.0 arc minutes, respectively (see below). In addition, the  
277 environmental covariates were aggregated for these same two spatial scales, 1.0 and 10.0 arc minutes,  
278 respectively. Human population density was included in all models as an offset so that the models  
279 appropriately represented epidemiological risk. The crude associations between JEV outbreaks and  
280 mean dry quarter precipitation, mean wet quarter precipitation, mean annual temperature, hydrological  
281 flow accumulation, proximity to each wetland type, proximity to rainfed agricultural systems, the  
282 composite landscape suitability of Ardeidae species, pig density, and poultry density were initially  
283 assessed individually with a separate simple inhomogeneous Poisson model (S2 Table 2). Features  
284 demonstrating bivariate associations with confidence intervals that did not include 0 were included as  
285 covariates in the multiple inhomogeneous Poisson models (S3 Figure 1, S4 Figure 2, S5 Figure 3). The  
286 features included as covariates in the multiple inhomogeneous Poisson models demonstrated low  
287 correlation (all values of the Pearson's  $r$  were  $<0.5$ ) and so were deemed appropriate to be included

288 together in the models. The associations between JEV outbreaks and landscape features were  
289 represented by relative risks, which were computed from the regression coefficients of the  
290 inhomogeneous Poisson models. Interaction between fragmented rainfed agriculture and the two  
291 dominant wetland types, river and freshwater marsh, were examined separately using a river-rainfed  
292 crops model and a freshwater marsh-rainfed crops model with a corresponding interaction term  
293 included in each model, respectively. In this way, the interaction between fragmented rainfed  
294 agriculture and both river and freshwater marsh wetlands was used to evaluate the impact of their  
295 shared landscape mosaics on JEV risk. The Akaike information criterion (AIC) assessed model fit, while  
296 the AUC assessed model performance. Importantly, model performance was tested against an  
297 independent, laboratory-confirmed dataset derived from the community-based surveys described  
298 above. The use of independent data for testing model performance provides a test of the external  
299 validity of the results thereby improving model assessment considerably. Model selection was based on  
300 a comparison the fit (based on AIC) of the full model to reduced model groups nested on three broad  
301 environmental domains (hydrogeography, animal hosts, and climate). These were also compared against  
302 a stepwise selection procedure with the full point process model to see if there was any divergence in  
303 model selection(55,56). Assessment of K-functions fitted to the JEV outbreaks before and after point  
304 process modelling with the specified environmental features was used to determine if these features  
305 adequately accounted for the observed spatial dependencies.

306         As described above, the influence of biotic and abiotic features have been shown to scale  
307 differently for some pathogen systems(22). To account for such scaling in the current investigation,  
308 models were fitted and assessed at local (1.0 arc minutes) and broad (10.0 arc minutes) scales. Likewise,  
309 model fit (AIC) and performance (AUC) were also compared across scales. The R statistical software  
310 version 3.6.1 was used to perform the analyses(52). Point process models were fitted and K-functions

311 estimated using the spatstat package(55,56). The silhouette images of Ardeidae, pigs, mosquitoes, and  
312 rice in Figure 1 were acquired from phylopic.org and used under Creative Commons license.

313

## 314 Results

315 The landscape suitability of individual Ardeidae species demonstrated a high degree of overlap  
316 with the composite landscape suitability (niche overlap > 88% for all species, and > 96% for all but one  
317 species; S1 Table 1), so the composite measure of Ardeidae suitability was used in the modelling of JEV  
318 outbreaks.

319 At 1.0 arc minute (~ 2 km), the best fitting and performing models of JEV outbreak risk under  
320 fragmented rainfed mosaics with freshwater marsh and fragmented rainfed mosaics with river were the  
321 reduced models 7 and 8, respectively, which excluded poultry (S6 Table S3; Table 1). These final models  
322 were further supported by the stepwise selection procedure implemented with the point process  
323 models. Japanese encephalitis virus outbreaks were strongly associated with both Ardeidae suitability  
324 (Table 1 Model 1 - RR = 1.14, 95%C.I. 1.07 – 1.21; Model 2 - RR = 1.13, 95%C.I. 1.06 – 1.21) and pig  
325 density (Model 1 - RR = 1.41, 95%C.I. 1.33 – 1.51; Model 2 - RR = 1.40, 95%C.I. 1.31 – 1.49), whereby an  
326 increasing presence of both in the landscape was associated with increased risk. Proximity to  
327 fragmented rainfed agricultural mosaics (Table 1, Model 1 - RR = 0.978 and Model 2 - RR = 0.979) was  
328 associated with increased risk of JEV outbreaks (inverse associations indicate increasing distance from  
329 this feature was associated with decreasing risk and vice versa), but not proximity to major non-  
330 fragmented rainfed agricultural systems (S2 Table 2). Importantly, proximity to both river and  
331 freshwater marsh wetlands were also strongly associated with increased risk, and each modified the  
332 association between JEV outbreaks and fragmented rainfed crop mosaics, such that proximity to the  
333 rainfed mosaics was associated with risk only in locations where the mosaics were shared with, or  
334 adjacent to, the two wetland habitats (Table 1). As expected, climate, especially precipitation, was also

335 strongly associated with JEV outbreaks. Estimates of the distribution of JEV outbreak risk with 95%  
336 confidence limits are presented in Figure 3. The spatial dependency apparent in JEV outbreaks as  
337 estimated by the homogenous K-function (left panels, Figure 4) was largely accounted for by the final  
338 inhomogeneous Poisson models (right panels, Figure 4).

339 At 10.0 arc minutes JEV outbreaks continued to demonstrate strong associations with pig  
340 density, wetlands and fragmented rainfed mosaics, and precipitation, however Ardeidae suitability and  
341 temperature did not continue to manifest influence at this broad scale (S7 Table 4).

342

#### 343 Discussion

344 This is the first investigation of JEV outbreaks to consider the impact of shared landscapes with  
345 key wildlife and domesticated animal reservoirs for JEV, while simultaneously assessing the convergence  
346 of natural wetland habitat with rainfed agriculture. Moreover, these landscape features were evaluated  
347 at multiple scales to determine whether their influence manifested differently at local and broad scales.  
348 Both wild ardeid and domestic pig hosts were strongly associated with JEV outbreak risk at local scale.  
349 However, at broad scale only pigs continued to manifest a broad footprint in the landscape. River and  
350 freshwater marsh systems and their shared landscapes with fragmented rainfed agriculture were also  
351 strongly associated with outbreak risk at both local and broad scale. These differences in risk between  
352 animal hosts and the environment demonstrate the importance of considering the ways in which biotic  
353 and abiotic features, respectively, comprise complex risk landscapes for JEV that vary with scale.  
354 Moreover, these could have potentially important policy implications for the control and prevention of  
355 outbreaks. For example, factors that dominate locally such as the sharing of space between ardeid birds  
356 and domestic pigs might be ideally targeted for intervention by local municipalities, whereas factors that  
357 dominate at broader scale, such as veterinary surveillance of pigs or the development of a novel pig  
358 vaccination program, may be more effectively targeted and resourced by state or national authorities.

359           The family Ardeidae comprises the wading birds, herons (including egrets) and bitterns. Ardeid  
360 birds have been recognised as key maintenance hosts for JEV(8–11). Domestic pigs, conversely, are  
361 important amplification hosts due to the high viremia associated with porcine infection(12–17). Pigs are  
362 also important since these are livestock animals and typically occupy space in close proximity to  
363 humans, although several heron species, such as the cattle egret, *Bubulcus ibis*, are also capable of  
364 thriving in anthropogenic landscapes(57). Therefore, as expected, both of these wild and domesticated  
365 animal hosts were strongly associated with outbreak risk at local scale in the current study. Interestingly,  
366 the influence of Ardeidae suitability appeared to manifest only at local scale, whereas pig density was  
367 associated with risk at local and broad scale. The difference in scaling of ardeid and pig hosts may reflect  
368 differences in the influence of Ardeidae-pig interfaces at different scales, whereby the influence of  
369 domestic pigs on JEV outbreaks may manifest regionally beyond the local impact of their interface with  
370 ardeid hosts, whereas the influence of the ardeid hosts may be confined to their local interface with  
371 pigs. Importantly, the current study did not observe and assess specific interactions between ardeid  
372 birds and pigs across India, which precludes any definitive conclusions about the roles of these hosts in  
373 the infection ecology of JEV at different scales of influence. Field investigations of interspecific  
374 interactions in local settings will be required to verify the results from the current study and ultimately  
375 define how different classes of hosts operate with respect to viral circulation and spillover at scale.

376           Wetlands can provide important habitat for mosquitoes and therefore increased outbreak risk  
377 associated with the provision of a stable source of surface water in these habitats is intuitive.  
378 Nevertheless, wetland systems are not homogeneous geomorphologically or ecologically, and neither  
379 were they homogeneous with respect to JEV occurrence as clearly demonstrated by the lack of  
380 association between outbreak risk and proximity to any surface water type (S2 Table 2). Instead, river  
381 and freshwater marsh wetlands dominated JEV outbreak risk, with both also demonstrating interaction  
382 with fragmented rainfed agriculture suggesting that shared landscapes of wetland habitat and

383 fragmented rainfed mosaics may be particularly important to the landscape epidemiology of JEV  
384 outbreaks. These associations are intuitive because wetland-rainfed agricultural mosaics may represent  
385 landscapes of more seasonally stable precipitation compared to rainfed crops that are far removed from  
386 wetland habitat. This was further supported by the strong and independent association with  
387 precipitation that was observed at both local and broad scale. Furthermore, fragmented rainfed mosaics  
388 within or adjacent to wetlands may also demarcate landscapes with limited control of water dispersal  
389 following inundation(20), which is particularly relevant to the annual monsoon flooding and which  
390 corresponds to the season of highest JEV incidence. It is also important to note that rainfed agriculture is  
391 typically a system employed by resource-limited subsistence farmers, with fragmented agricultural  
392 landscapes often corresponding to more economically disadvantaged communities(20), and which also  
393 tend to represent a preponderance of the annual JEV incident cases(2). Therefore, not only do these  
394 findings provide further insight into the epidemiology of JEV outbreaks, they also identify vulnerable  
395 communities that are likely to be at greatest risk and which may yield maximum benefit from targeted  
396 resource allocation to prevent future outbreaks.

397         As expected, increasing precipitation was associated with increased JEV outbreak risk at both  
398 local and broad scale. Interestingly, temperature was inversely associated JEV outbreak risk at local  
399 scale, but demonstrated no association at broad scale. While JEV outbreaks were widely distributed  
400 across India, there was a preponderance of occurrence in the wettest areas of the country, which also  
401 tend to coincide with areas of slightly lower mean annual temperature and may reflect this inverse  
402 association at local scale. Alternatively, areas of more extreme heat in India may exist within a  
403 temperature spectrum that is less favourable to the provision of habitat for reservoirs and vectors, to  
404 vector development and longevity, to the extrinsic incubation period in vectors, or the areas of highest  
405 temperature regimes may simply be coincident with precipitation and humidity regimes that are less  
406 favourable(4). Regardless, these associations are based on climate rather than weather. As such, future



407 work will need to explore the effects of specific weather events and patterns with the requisite  
408 temporal resolution to link fluctuations in precipitation and temperature with individual JEV outbreaks.  
409 For example, one study examined a long-term time series of JEV occurrence and found that increases in  
410 both rainfall and temperature were associated with increased risk(21). However, this work was limited  
411 to one district in one state, so more work will require examination across many more of India's  
412 heterogenous landscapes to better understand how weather fluctuation may operate in different  
413 landscapes. Nevertheless, the association between JEV and precipitation has shown broad geographical  
414 consistency as manifested in China, for example, where cases were mostly concentrated in landscapes  
415 with annual precipitation greater than 400 mm irrespective of whether these landscapes were  
416 characterised by warm-temperate, semitropical or tropical climate regimes(58).

417         It is important to acknowledge and discuss some additional limitations attending this work. First,  
418 although the national IDSP surveillance system was used to capture all reported outbreaks under  
419 investigation, we recognise that reporting bias may still be present. To correct for potential reporting  
420 bias, rather than randomly selecting background points for the point process models, background  
421 sampling was instead weighted by the distribution of IMR as a robust indicator of health system  
422 accessibility and infrastructure. Second, the species distribution models used to construct Ardeidae  
423 suitability were based on human observations and so are also subject to reporting bias, insofar as bird  
424 accessibility is likely to impact reporting effort. Reporting bias in Ardeidae observations was corrected by  
425 weighting the sampling of background points by HFP as an indicator of accessibility. In addition, while  
426 this study was able to estimate the landscape suitability of several Ardeidae species, there were some  
427 species for which there were too few observations to validly model suitability. As such, we concede that  
428 this work is not an exhaustive representation of all possible species niches and therefore some aspects  
429 may yet remain undescribed by these findings. Third, the climate measures interrogated in the models  
430 presented were based on decadal averages over the period from 1950 to 2000, which assumes

431 homogeneity over this time period as well as over the period of JEV outbreak surveillance under  
432 investigation. However, the current study sought to model the influence of climate features in the  
433 landscape rather than specific weather events, so these assumptions were deemed appropriate.

434         This study showed that JEV risk in India was strongly associated with the distribution of animal  
435 hosts and the shared landscapes between fragmented rainfed agriculture and river and freshwater  
436 marsh wetlands. Importantly, animal hosts operated with different degrees of influence at local and  
437 broad scale, which may provide unique opportunities to target distinct aspects of JEV landscape  
438 epidemiology with differential resource allocation by local and state (or national) municipalities,  
439 respectively, to optimise control and prevention of JEV outbreaks. For example, the World Health  
440 Organisation has outlined potential forms of landscape manipulation and modification, such as the  
441 rotation or synchronisation of crop cycles, alternating crop varieties with variable growing seasons, or  
442 mechanical intervention on water movement through the landscape to subvert vector breeding(59).  
443 Moreover, the mitigation of vector abundance directly associated with rainfed agriculture may be  
444 negated where wetland habitat is present (i.e. in fragmented mosaics) representing a refuge for  
445 mosquitoes from control measures and therefore a need for increased attention. Alternatively, there  
446 may be opportunities for the repositioning of livestock animal pens at sites more distal to human  
447 residences, or locations of agricultural activity, to limit the vector-animal-human interface(59). These  
448 kinds of hyperlocal interventions could be ideally suited to administration by local municipalities such as  
449 the sub-district taluks (tehsils), particularly since such interventions often require working closely with  
450 affected communities. In contrast, broader interventions such as those involving resource-intensive  
451 vaccination campaigns of humans (or livestock) may be more effectively orchestrated at the state or  
452 national levels. The findings highlight the importance of developing collaborative surveillance  
453 infrastructure for vectors, animals, and humans across scale such that an effective surveillance system  
454 will require operation and communication within and between taluks, districts, and states. These

455 surveillance systems should also remain adaptive to the influence of land use change, climate change,  
456 and urbanisation that may also influence future risks of JEV in India.

457

458

459

460

461

462

463

464

465

466

467

468

469

470

471

472

473

474

475

476

477

478

479

480

481

482

483 References

- 484 1. Organization WH. Japanese encephalitis vaccines: WHO position paper. *Wkly Epidemiol Rec.*  
485 2015;90:69–87.
- 486 2. National vectorborne Disease Control Program, Ministry of Health and Family Welfare G of I.  
487 Statewise number of AES/JE cases and deaths from 2010–2017. 2017;
- 488 3. Mackenzie JS, Barrett A, Deubel V. The Japanese Encephalitis Serological Group of Flaviviruses: a  
489 Brief Introduction to the Group. In: Mackenzie JS, Barrett A, Deubel V, editors. *Japanese*  
490 *Encephalitis and West Nile Viruses*. Berlin: Springer-Verlag; 2002. p. 1–10.
- 491 4. Endy TP, Nisalak A. Japanese Encephalitis Virus: Ecology and Epidemiology. In: Mackenzie JS,  
492 Barrett A, Deubel V, editors. *Japanese Encephalitis and West Nile Viruses*. Berlin: Springer-Verlag;  
493 2002. p. 11–48.
- 494 5. Longbottom J, Browne AJ, Pigott DM, Sinka ME, Golding N, Hay SI, et al. Mapping the spatial  
495 distribution of the Japanese encephalitis vector, *Culex tritaeniorhynchus* Giles, 1901 (Diptera:  
496 Culicidae) within areas of Japanese encephalitis risk. *Parasites and Vectors*. 2017;10(1):1–12.
- 497 6. Samy AM, Alkhishe AA, Thomas SM, Wang L, Zhang W. Mapping the potential distributions of  
498 etiological agent, vectors, and reservoirs of Japanese Encephalitis in Asia and Australia. *Acta Trop*  
499 [Internet]. 2018;188(August):108–17. Available from:  
500 <https://doi.org/10.1016/j.actatropica.2018.08.014>
- 501 7. Thankachy S, Dash S, Sahu SS. Entomological factors in relation to the occurrence of Japanese  
502 encephalitis in Malkangiri district, Odisha State, India. *Pathog Glob Health* [Internet].  
503 2019;113(5):246–53. Available from: <https://doi.org/10.1080/20477724.2019.1670926>
- 504 8. Rodrigues FM, Guttikar SN, Pinto BD. Prevalence of antibodies to Japanese encephalitis and West  
505 Nile viruses among wild birds in the Krishna-Godavari Delta, Andhra Pradesh, India. *Trans R Soc*  
506 *Trop Med Hyg.* 1981;75(2):258–62.
- 507 9. Jamgaonkar A V., Yergolkar PN, Geevarghese G, Joshi GD, Joshi M V., Mishra AC. Serological  
508 evidence for Japanese encephalitis virus and West Nile virus infections in water frequenting and  
509 terrestrial wild birds in Kolar District, Karnataka State, India. A retrospective study. *Acta Virol.*  
510 2003;47(3):185–8.
- 511 10. Buescher EL, Scherer WF, Rosenberg MZ, Kutner LJ. Immunologic studies of Japanese encephalitis  
512 virus in Japan. IV. Maternal antibody in birds. *J Immunol.* 1959;83:614–9.
- 513 11. Bhattacharya S, Basu P. Japanese Encephalitis Virus (JEV) infection in different vertebrates and its  
514 epidemiological significance: a Review. *Int J Fauna Biol Stud* [Internet]. 2014;1(6):32–7. Available  
515 from: <https://pdfs.semanticscholar.org/51c4/860d8c66c5fa9d730143e836b8db0b21c1a4.pdf>
- 516 12. Baruah A, Hazarika R, Barman N, Islam S, Gulati B. Mosquito abundance and pig seropositivity as  
517 a correlate of Japanese encephalitis in human population in Assam, India. *J Vector Borne Dis.*  
518 2018;55(4):291–6.
- 519 13. Borah J, Dutta P, Khan SA, Mahanta J. Epidemiological concordance of Japanese encephalitis virus  
520 infection among mosquito vectors, amplifying hosts and humans in India. *Epidemiol Infect.*  
521 2013;141(1):74–80.

- 522 14. Kakkar M, Chaturvedi S, Saxena VK, Dhole TN, Kumar A, Rogawski ET, et al. Identifying sources,  
523 pathways and risk drivers in ecosystems of Japanese Encephalitis in an epidemic-prone north  
524 Indian district. *PLoS One*. 2017;12(5):1–17.
- 525 15. Chen B, Beaty B. Japanese encephalitis vaccine (2-8 strain) and parent (SA 14 strain) viruses in  
526 *Culex tritaeniorhynchus* mosquitoes. *Am J Trop Med Hyg*. 1982;31:403–7.
- 527 16. Komada K, Sasaki N, Inoue Y. Studies of live attenuated Japanese encephalitis vaccine in swine. *J*  
528 *Immunol*. 1968;100:194–200.
- 529 17. Ghimire S, Dhakal S, Ghimire NP, Joshi DD. Pig Sero-Survey and Farm Level Risk Factor  
530 Assessment for Japanese Encephalitis in Nepal. *Int J Appl Sci Biotechnol*. 2014;2(3):311–4.
- 531 18. Le Flohic G, Porphyre V, Barbazan P, Gonzalez J-P. Review of Climate, Landscape, and Viral  
532 Genetics as Drivers of the Japanese Encephalitis Virus Ecology. Johansson MA, editor. *PLoS Negl*  
533 *Trop Dis* [Internet]. 2013 Sep 12 [cited 2021 Aug 27];7(9):e2208. Available from:  
534 <https://dx.plos.org/10.1371/journal.pntd.0002208>
- 535 19. del Hoyo J, Elliott A, Vicens JS, Christie DA. Handbook of the Birds of the World [Internet]. Elliott  
536 A, Vicens JS, del Hoyo J, editors. Vols. 1-17. Barcelona: Lynx Edicions; 2013 [cited 2020 Jun 23].  
537 Available from: <https://www.lynxeds.com/product-category/by-categories/encyclopedias/hbw/>
- 538 20. Devendra C. Rainfed agriculture: its importance and potential in global food security. *Utar Agric*  
539 *Sci J*. 2016;2(2):4–17.
- 540 21. Singh H, Singh N, Mall RK. Japanese Encephalitis and Associated Environmental Risk Factors in  
541 Eastern Uttar Pradesh: A time series analysis from 2001 to 2016. *Acta Trop* [Internet].  
542 2020;212(May):105701. Available from: <https://doi.org/10.1016/j.actatropica.2020.105701>
- 543 22. Cohen JM, Civitello DJ, Brace AJ, Feichtinger EM, Ortega CN, Richardson JC, et al. Spatial scale  
544 modulates the strength of ecological processes driving disease distributions. *Proc Natl Acad Sci*  
545 [Internet]. 2016;113(24):E3359–64. Available from:  
546 <http://www.pnas.org/lookup/doi/10.1073/pnas.1521657113>
- 547 23. Becker DJ, Washburne AD, Faust CL, Mordecai EA, Plowright RK. The problem of scale in the  
548 prediction and management of pathogen spillover. *Philos Trans R Soc B Biol Sci*.  
549 2019;374(1782):20190224.
- 550 24. National Centre for Disease Control, Directorate General of Health Services, Ministry of Health  
551 and Family Welfare. Integrated Disease Surveillance Programme(IDSP) [Internet]. [cited 2020 Sep  
552 3]. Available from: <https://idsp.nic.in/>
- 553 25. Balakrishnan A, Thekkekare R, Sapkal G, Tandale B. Seroprevalence of Japanese encephalitis virus  
554 & West Nile virus in Alappuzha district, Kerala. *Indian J Med Res* [Internet]. 2017 Jul 1 [cited  
555 2021 Jul 21];146(7):70. Available from: <http://www.ijmr.org.in/text.asp?2017/146/7/70/219461>
- 556 26. Dwibedi B, Mohapatra N, Rathore S, Panda M, Pati S, Sabat J, et al. An outbreak of Japanese  
557 encephalitis after two decades in Odisha, India. *Indian J Med Res* [Internet]. 2015 Dec 1 [cited  
558 2021 Jul 21];142(7):30. Available from: <http://www.ijmr.org.in/text.asp?2015/142/7/30/176609>
- 559 27. Ramesh D, Muniaraj M, Samuel Pp, Thenmozhi V, Venkatesh A, Nagaraj J, et al. Seasonal  
560 abundance & role of predominant Japanese encephalitis vectors *Culex tritaeniorhynchus* & *Cx.*  
561 *gelidus* Theobald in Cuddalore district, Tamil Nadu. *Indian J Med Res* [Internet]. 2015 Dec 1 [cited

- 2021 Jul 21];142(7):29. Available from: <http://www.ijmr.org.in/text.asp?2015/142/7/23/176607>
- 563 28. Nyari N, Singh D, Kakkar K, Sharma S, Pandey SN, Dhole TN. Entomological and serological  
564 investigation of Japanese encephalitis in endemic area of eastern Uttar Pradesh, India. *J Vector*  
565 *Borne Dis.* 2015;52(4):321–8.
- 566 29. Reidpath DD, Allotey P. Infant mortality rate as an indicator of population health. *J Epidemiol*  
567 *Community Health* [Internet]. 2003 May 1 [cited 2020 Jul 14];57(5):344–6. Available from:  
568 <https://pubmed.ncbi.nlm.nih.gov/12700217/>
- 569 30. Choi J, Ki M, Kwon HJ, Park B, Bae S, Oh C-M, et al. Health Indicators Related to Disease, Death,  
570 and Reproduction. *J Prev Med Public Heal* [Internet]. 2019 Jan 31 [cited 2020 Jul 14];52(1):14–20.  
571 Available from: <http://jpmph.org/journal/view.php?doi=10.3961/jpmph.18.250>
- 572 31. Ignacio Ruiz J, Nuhu K, Tyler McDaniel J, Popoff F, Izcovich A, Martin Criniti J. Inequality as a  
573 powerful predictor of infant and maternal mortality around the world. *PLoS One* [Internet]. 2015  
574 Oct 21 [cited 2020 Jul 14];10(10). Available from: <https://pubmed.ncbi.nlm.nih.gov/26488170/>
- 575 32. Center for International Earth Science Information Network - CIESIN - Columbia University. Global  
576 Subnational Infant Mortality Rates, Version 2 [Internet]. Palisades; 2019. Available from:  
577 <https://doi.org/10.7927/H4PN93JJ>
- 578 33. Center for International Earth Science Information Network - CIESIN - Columbia University,  
579 International Food Policy Research Institute - IFPRI, The World Bank and CI de AT-C. Population  
580 Density Grid, v1: Global Rural-Urban Mapping Project (GRUMP), v1 | SEDAC [Internet]. Palisades,  
581 NY: NASA Socioeconomic Data and Applications Center (SEDAC). [cited 2014 Oct 23]. Available  
582 from: <http://sedac.ciesin.columbia.edu/data/set/grump-v1-population-density>
- 583 34. GBIF. GBIF occurrence download - Ardeidae India [Internet]. Global Biodiversity Information  
584 Facility. 2021. Available from: <https://doi.org/10.15468/dl.s99zmx>
- 585 35. Robinson TP, Wint GRW, Conchedda G, Van Boeckel TP, Ercoli V, Palamara E, et al. Mapping the  
586 global distribution of livestock. *PLoS One* [Internet]. 2014 Jan [cited 2015 May 26];9(5):e96084.  
587 Available from:  
588 <http://www.pubmedcentral.nih.gov/articlerender.fcgi?artid=4038494&tool=pmcentrez&render>  
589 [type=abstract](http://www.pubmedcentral.nih.gov/articlerender.fcgi?artid=4038494&tool=pmcentrez&render)
- 590 36. Ogata M, Nagao Y, Jitsunari F, Kitamura N, Okazaki T. Infection of herons and domestic fowls with  
591 Japanese encephalitis virus with specific reference to maternal antibody of hen (epidemiological  
592 study on Japanese encephalitis 26). *Acta Med Okayama.* 1970;24:175–84.
- 593 37. Bhattacharya S, Chakraborty S, Chakraborty S, Ghosh K, Palit A, Mukherjee K, et al. Density of  
594 *Culex vishnui* and appearance of JE antibody in sentinel chicks and wild birds in relation to  
595 Japanese encephalitis cases. *Trop Geogr Med* [Internet]. 1988 [cited 2021 Aug 13];38(1):46–50.  
596 Available from: <https://pubmed.ncbi.nlm.nih.gov/3008391/>
- 597 38. Socioeconomic Data and Applications Center | SEDAC. Methods » Last of the Wild, v2 | SEDAC  
598 [Internet]. [cited 2014 Dec 23]. Available from:  
599 <http://sedac.ciesin.columbia.edu/data/collection/wildareas-v2/methods>
- 600 39. Sanderson EW, Jaiteh M, Levy MA, Redford KH, Wannebo A V, Woolmer G. The Human Footprint  
601 and the Last of the Wild. 2002;52(10).

- 602 40. Lehner B, Verdin K, Jarvis A. HydroSHEDS Technical Documentation [Internet]. 2006. Available  
603 from: <http://hydrosheds.cr.usgs.gov>
- 604 41. Fund WW. Global Lakes and Wetlands Database [Internet]. Available from:  
605 <http://www.worldwildlife.org/pages/global-lakes-and-wetlands-database>
- 606 42. Lehner B, Döll P. Development and validation of a global database of lakes, reservoirs and  
607 wetlands. *J Hydrol*. 2004 Aug;296(1-4):1–22.
- 608 43. QGIS Development Team. QGIS Geographic Information System [Internet]. Open Source  
609 Geospatial Foundation; 2009. Available from: <http://www.qgis.org/>
- 610 44. Thenkabail P, Teluguntla P, Xiong J, Oliphant A, Massey R. LP DAAC - GFSAD1KCM [Internet].  
611 Global Food Security Support Analysis Data (GFSAD) Crop Mask 2010 Global 1 km V001. 2016  
612 [cited 2021 Jul 21]. Available from: <https://lpdaac.usgs.gov/products/gfsad1kcmv001/>
- 613 45. WorldClim - Global Climate. Data for current conditions (~1950-2000) | WorldClim - Global  
614 Climate Data [Internet]. WorldClim - Global Climate Data. [cited 2014 Oct 23]. Available from:  
615 <http://www.worldclim.org/current>
- 616 46. Elith J, Leathwick JR, Hastie T. A working guide to boosted regression trees. *J Anim Ecol*. 2008  
617 Jul;77(4):802–13.
- 618 47. Friedman J. Greedy function approximation: a gradient boosting machine. *Ann Stat*.  
619 2001;29(5):1189–232.
- 620 48. Breiman L. Random forests. *Mach Learn*. 2001;45(1):5–32.
- 621 49. James G, Witten D, Hastie T, Tibshirani R. An introduction to Statistical Learning. Vol. 7, Current  
622 medicinal chemistry. 2000. 303-321 p.
- 623 50. Naimi B, Araújo MB. sdm: a reproducible and extensible R platform for species distribution  
624 modelling. *Ecography (Cop)* [Internet]. 2016 Apr 1 [cited 2021 Feb 12];39(4):368–75. Available  
625 from: <http://doi.wiley.com/10.1111/ecog.01881>
- 626 51. Warren DL, Glor RE, Turelli M. Environmental niche equivalency versus conservatism:  
627 quantitative approaches to niche evolution. *Evolution* [Internet]. 2008 Nov [cited 2018 Jun  
628 7];62(11):2868–83. Available from: <http://doi.wiley.com/10.1111/j.1558-5646.2008.00482.x>
- 629 52. R Core Team. R: A language and environment for statistical computing [Internet]. Vienna: R  
630 Foundation for Statistical Computing; 2016. Report No.: 3.1.3. Available from: [https://www.r-](https://www.r-project.org/)  
631 [project.org/](https://www.r-project.org/)
- 632 53. Hijmans RJ, Phillips S, Leathwick JR, Elith J. Package “dismo.” The Comprehensive R Archive  
633 Network. 2014. p. 1–65.
- 634 54. Baddeley A, Turner R. Practical Maximum Pseudolikelihood for Spatial Point Patterns (with  
635 Discussion). *Aust J Stat* [Internet]. 2000 Sep [cited 2014 Oct 23];42(3):283–322. Available from: [http://doi.wiley.com/10.1111/1467-](http://doi.wiley.com/10.1111/1467-842X.00128)  
636 [842X.00128](http://doi.wiley.com/10.1111/1467-842X.00128)  
637
- 638 55. Baddeley A, Turner R. spatstat: An R Package for Analyzing Spatial Point Patterns. *J Stat Softw*  
639 12(6) [Internet]. 2005 [cited 2014 Oct 23]; Available from: <http://www.jstatsoft.org/v12/i06/>

640 56. Baddeley A, Rubak E, Turner R. Spatial Point Patterns: Methodology and Applications with R  
641 [Internet]. Vol. 11. CRC Press; 2015 [cited 2016 Feb 5]. 810 p. Available from:  
642 <https://books.google.com/books?id=rGbmCgAAQBAJ&pgis=1>

643 57. BirdLifeInternational. Bubulcus ibis [Internet]. The IUCN Red List of Threatened Species 2015:  
644 e.T22697109A60156122. 2015. Available from:  
645 <https://www.iucnredlist.org/species/22697109/60156122>

646 58. HUANG XX, YAN L, GAO XY, REN YH, FU SH, CAO YX, et al. The Relationship between Japanese  
647 Encephalitis and Environmental Factors in China Explored Using National Surveillance Data. Vol.  
648 31, Biomedical and Environmental Sciences. Elsevier Ltd; 2018. p. 227–32.

649 59. World Health Organization. Agricultural Development and Vector-Borne Diseases [Internet].  
650 Training and Information Materials and Vector Biology and Control. 1996. Available from:  
651 [https://www.who.int/water\\_sanitation\\_health/resources/agridevbegin.pdf](https://www.who.int/water_sanitation_health/resources/agridevbegin.pdf)

652

653

654

655

656

657

658

659

660

661

662

663

664

665

666

667

668

669

670



671 Table 1. Adjusted relative risks and 95% confidence intervals for the associations between Japanese  
 672 encephalitis virus (JEV) outbreaks and each landscape feature as derived from the best fitting  
 673 inhomogeneous Poisson models. Each landscape feature is adjusted for all others in each of the two  
 674 models. Models are at a scale of 1.0 arc minutes (~2 km).

| Landscape feature                                             | Relative risk | 95% confidence interval | p-value  |
|---------------------------------------------------------------|---------------|-------------------------|----------|
| <i>Model 1 – Freshwater marsh-rainfed mosaics interaction</i> |               |                         |          |
| Ardeidae landscape suitability (deciles)                      | 1.14          | 1.07 – 1.21             | 0.00005  |
| Pig density (deciles)                                         | 1.41          | 1.33 – 1.51             | <0.00001 |
| Distance to river (2 km)                                      | 0.74          | 0.56 – 0.99             | 0.02     |
| Distance to freshwater marsh (2 km)                           | 0.71          | 0.63 – 0.82             | <0.00001 |
| Distance to fragmented rainfed agriculture                    | 0.978         | 0.969 – 0.987           | <0.00001 |
| Freshwater marsh:fragmented rainfed agriculture               | 1.008         | 1.003 – 1.014           | 0.0007   |
| Mean precipitation during the wettest quarter (10 cm)         | 1.008         | 1.006 – 1.009           | <0.00001 |
| Mean precipitation during the driest quarter (10 cm)          | 1.14          | 1.08 – 1.19             | <0.00001 |
| Mean annual temperature (Celsius)                             | 0.90          | 0.85 – 0.96             | 0.002    |
| <i>Model 2 – River-rainfed mosaics interaction</i>            |               |                         |          |
| Ardeidae landscape suitability (deciles)                      | 1.13          | 1.06 – 1.21             | 0.00005  |
| Pig density (deciles)                                         | 1.40          | 1.31 – 1.49             | <0.00001 |
| Distance to river (2 km)                                      | 0.63          | 0.46 – 0.85             | 0.001    |
| Distance to freshwater marsh (2 km)                           | 0.78          | 0.70 – 0.88             | <0.00001 |
| Distance to fragmented rainfed agriculture                    | 0.979         | 0.971 – 0.987           | <0.00001 |
| River:fragmented rainfed agriculture                          | 1.012         | 1.006 – 1.017           | 0.00003  |
| Mean precipitation during the wettest quarter (10 cm)         | 1.007         | 1.006 – 1.009           | <0.00001 |
| Mean precipitation during the driest quarter (10 cm)          | 1.14          | 1.09 – 1.19             | <0.00001 |
| Mean annual temperature (Celsius)                             | 0.91          | 0.86 – 0.97             | 0.0009   |

675  
 676  
 677  
 678  
 679  
 680  
 681  
 682  
 683  
 684  
 685  
 686

687 Figure legends

688 Figure 1. Theoretical representation of landscapes with wetland (A) and rainfed crop (B) mosaics and  
689 their potential animal host occupants. Multiple transmission cycles of Japanese encephalitis virus (JEV)  
690 may be realised in such landscapes such as transmission among Ardeidae maintenance hosts (C1),  
691 shared transmission between ardeid birds and domestic pigs at the wildlife-livestock interface (C2), and  
692 concentrated transmission among porcine amplification hosts (C3).

693 Figure 2. The spatial (left) and temporal (right) distributions of Japanese encephalitis virus (JEV)  
694 outbreaks in India. Outbreaks that occurred during the high incidence period are represented in  
695 burgundy and those that occurred during the low incidence period in khaki. The map does not reflect  
696 the authors' assertion of territory or borders of any sovereign country including India and is displayed  
697 only to present the distribution of JEV occurrence.

698 Figure 3. Japanese encephalitis virus (JEV) outbreak risk based on predicted intensity at 1.0 arc minutes  
699 (approximately 2 km). The centre panels depict the distribution of JEV risk for freshwater marsh-  
700 fragmented rainfed mosaics (top) and for river-fragmented rainfed mosaics (bottom) models as deciles  
701 of the predicted intensities from the best fitting and performing inhomogeneous Poisson point process  
702 models (Table 1). The left and right panels depict the lower and upper 95% confidence limits,  
703 respectively, for the predicted intensities. The map does not reflect the authors' assertion of territory or  
704 borders of any sovereign country including India and is displayed only to present the distribution of JEV  
705 occurrence.

706 Figure 4. Homogeneous (left panels) and inhomogeneous (right panels) K-functions for the Japanese  
707 encephalitis virus (JEV) outbreak point process. The homogeneous K-function is not an appropriate fit  
708 due to the spatial dependency in JEV outbreaks as depicted by the divergent empirical (black line) and  
709 theoretical functions (the latter is the theoretical function under complete spatial randomness,  
710 represented by the dashed red line with confidence bands in grey). In contrast, the freshwater marsh-  
711 fragmented rainfed mosaics (top) and river-fragmented rainfed mosaics (bottom) model-based  
712 inhomogeneous K-functions show that the spatial dependency was accounted for by the model  
713 covariates (overlapping empirical and theoretical functions). The x-axes,  $r$ , represent increasing radii of  
714 subregions of the window of JEV outbreaks, while the y-axes represent the K-functions.

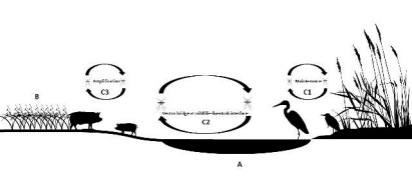

### JEV Outbreaks (2010 - 2020)

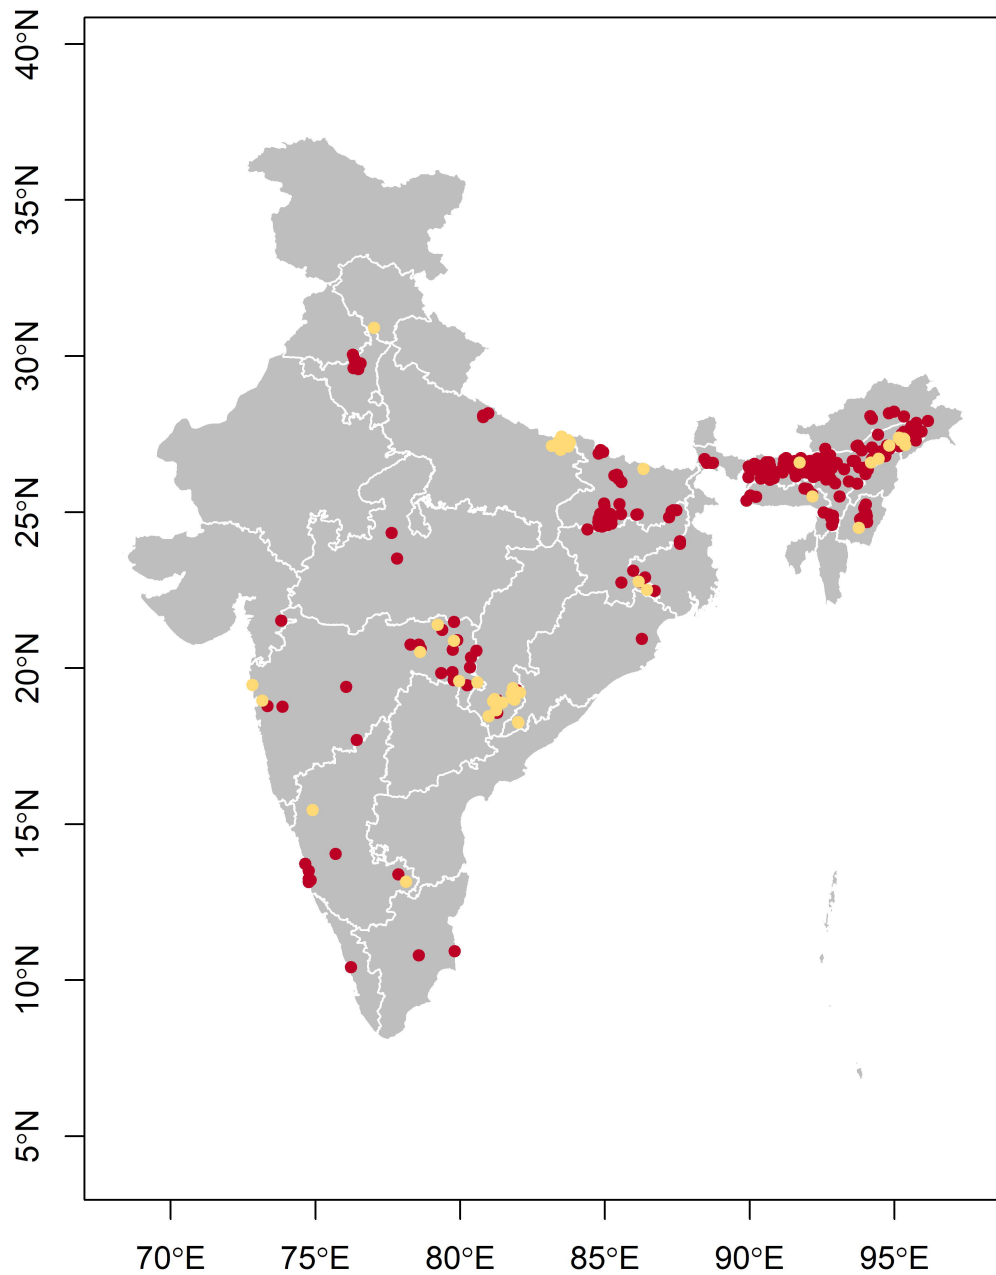

### JEV Outbreak Counts by Month (2010 - 2020)

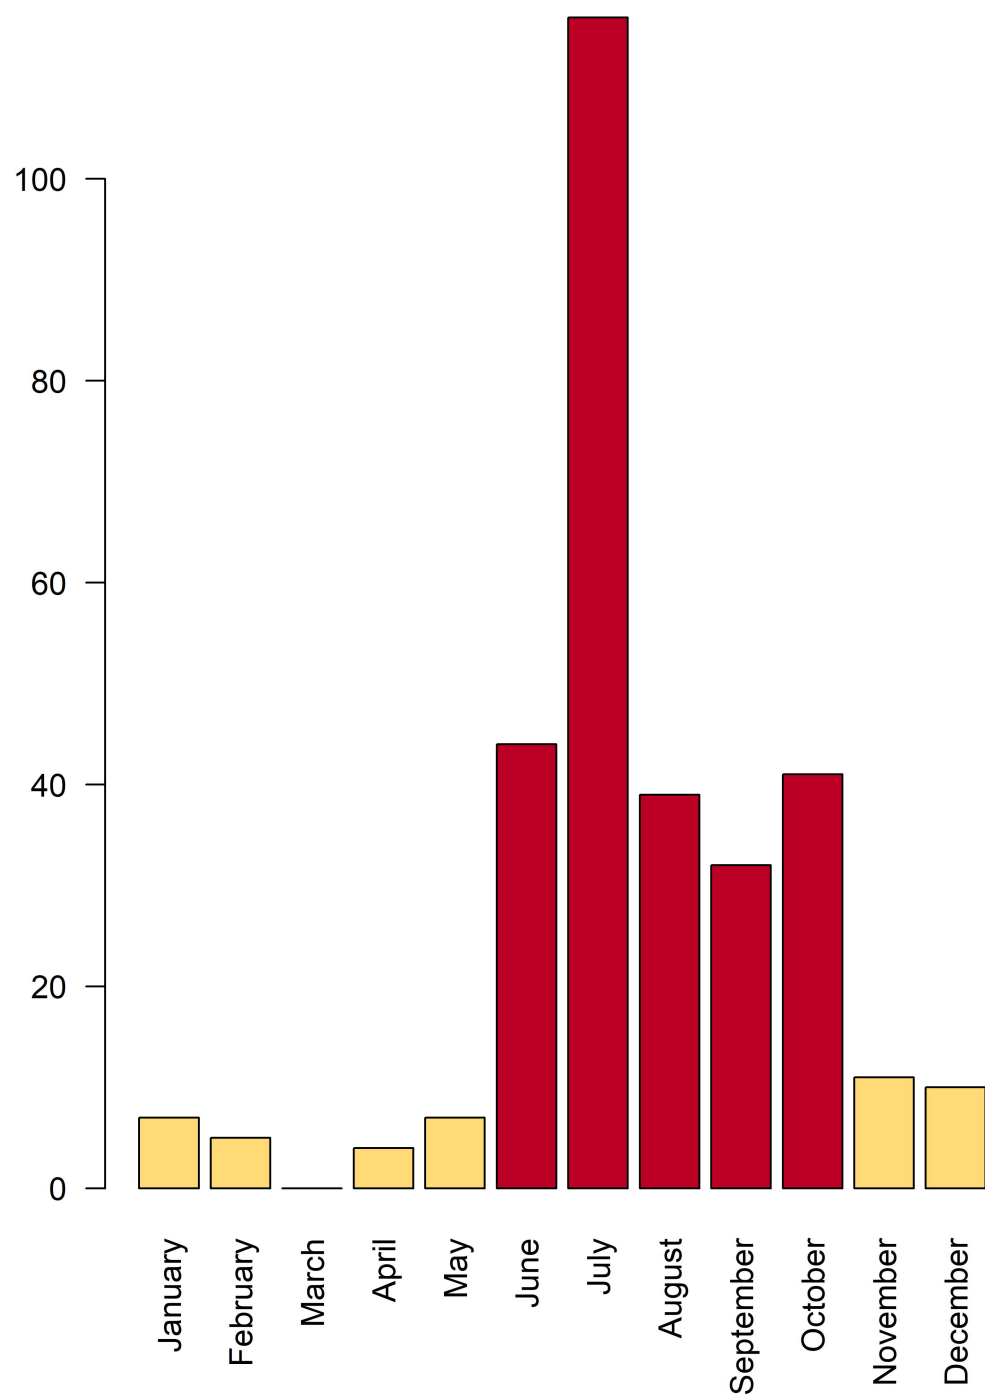

**Lower 95% C.L.**

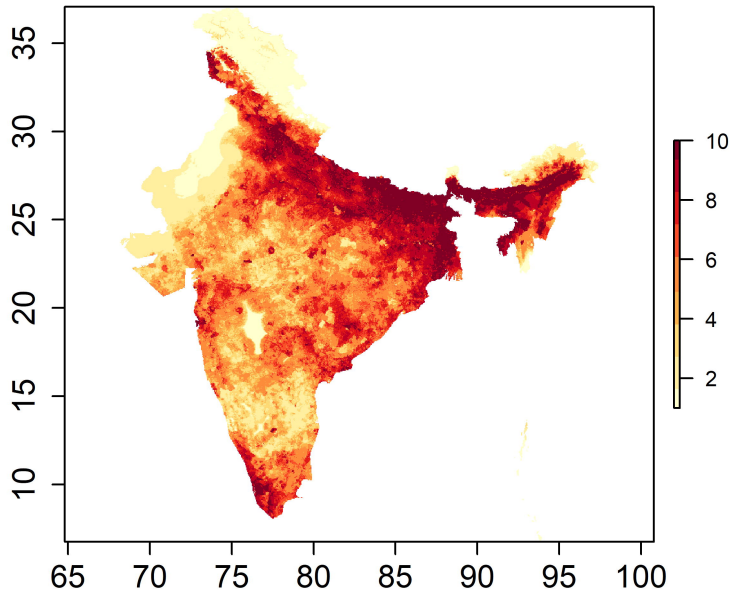

**JEV suitability (Marsh-rainfed mosaics)**

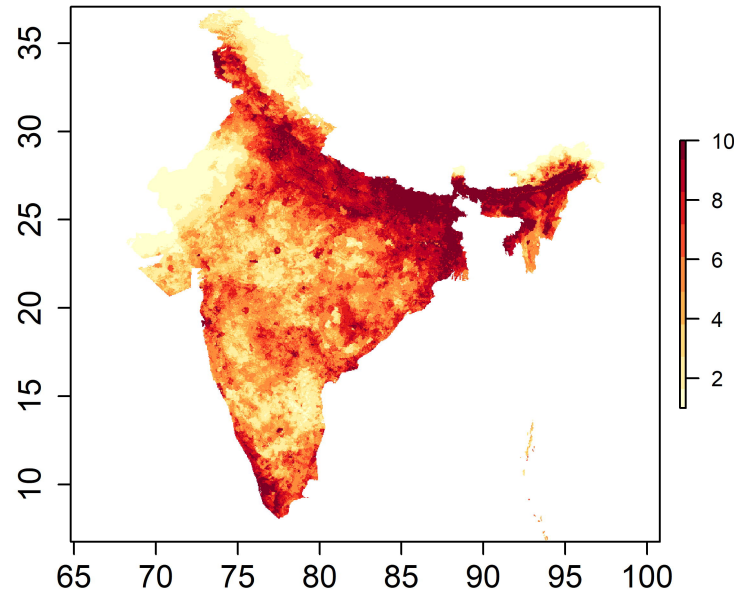

**Upper 95% C.L.**

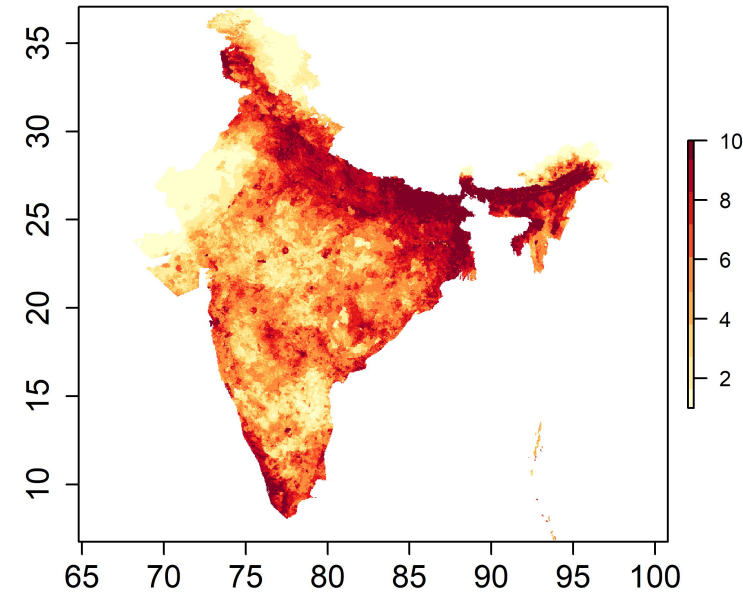

**Lower 95% C.L.**

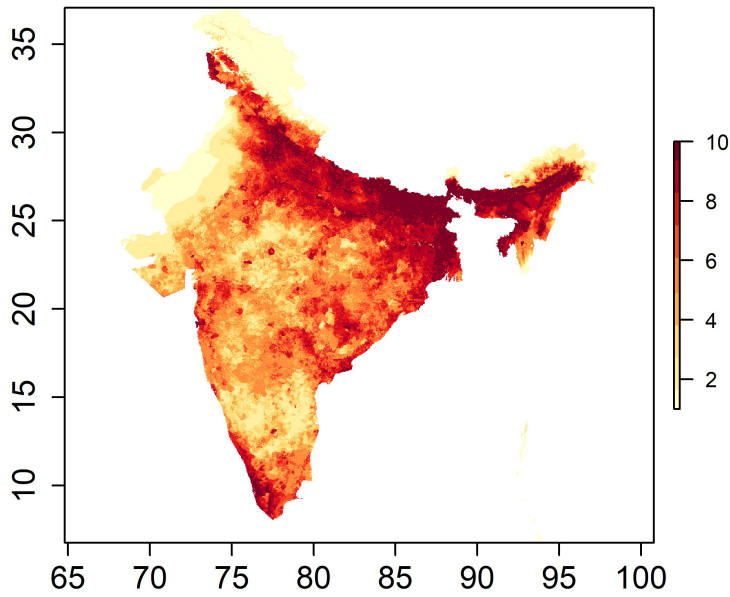

**JEV suitability (River-rainfed mosaics)**

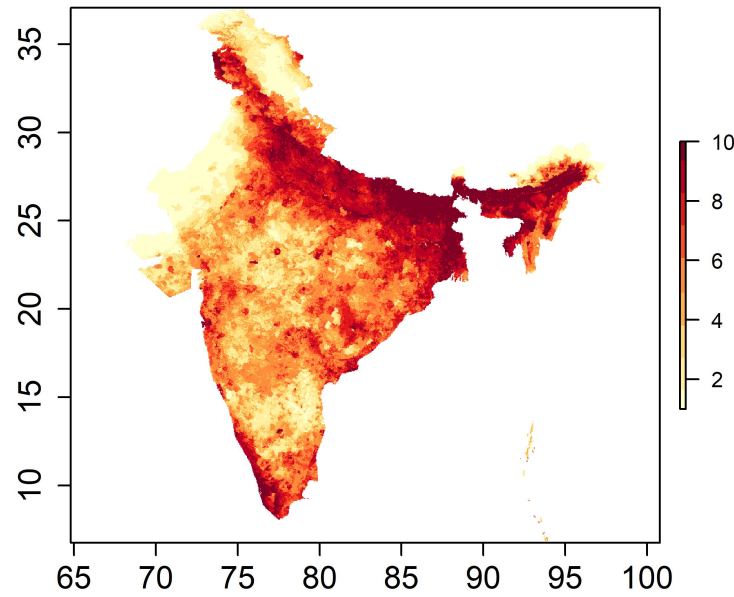

**Upper 95% C.L.**

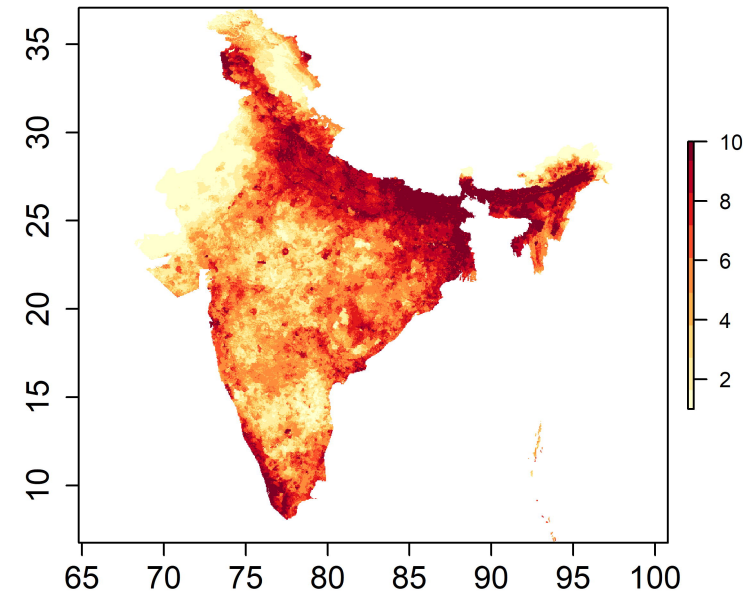

Homogeneous K function for JEV

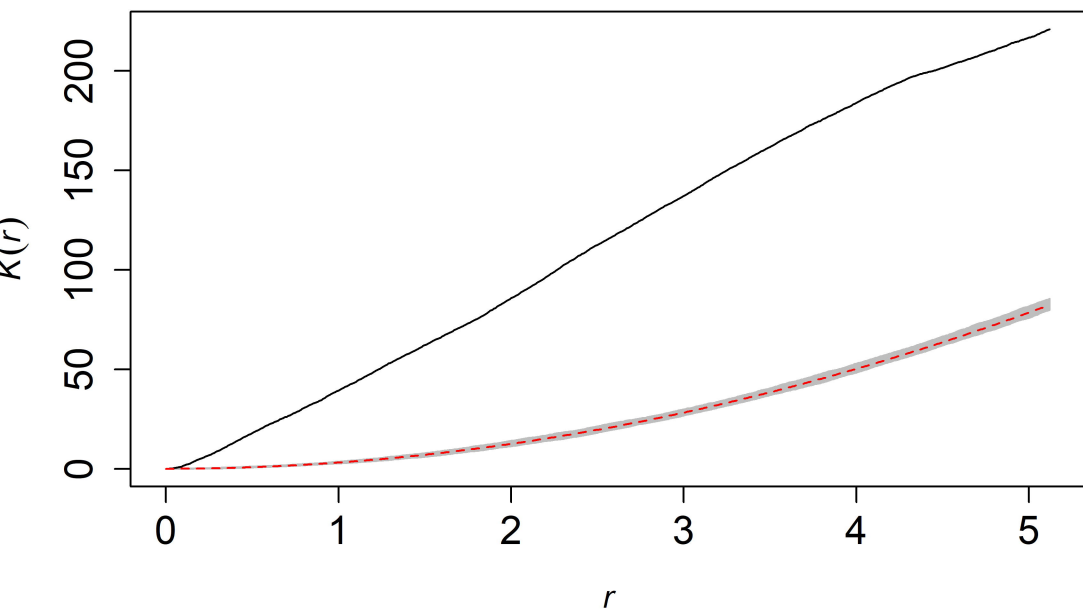

Inhomogeneous K function for JEV (Marsh-rainfed mosaics)

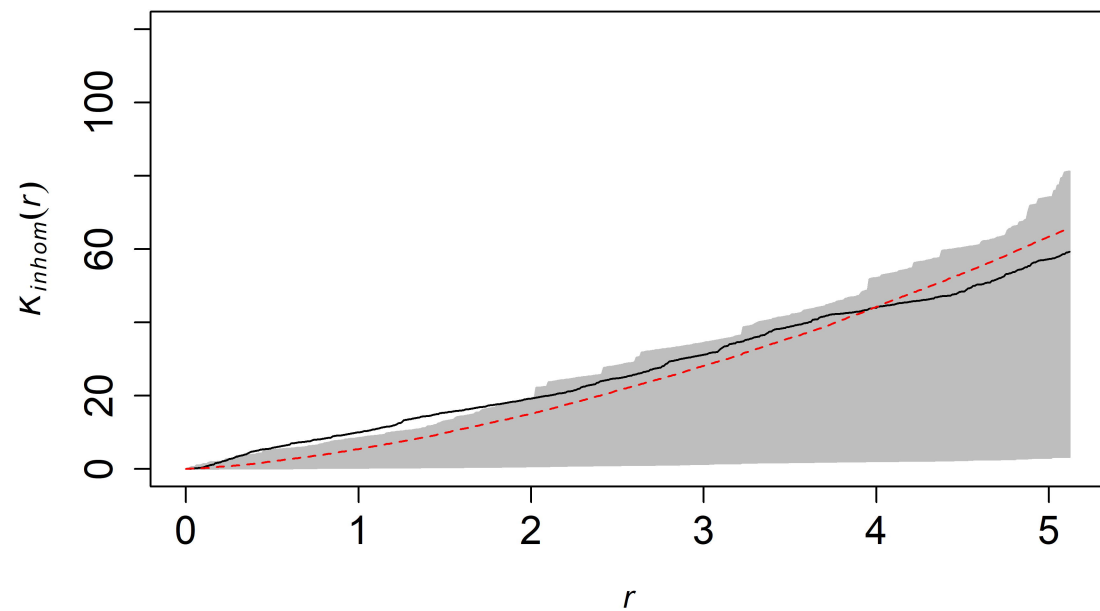

Homogeneous K function for JEV



Inhomogeneous K function for JEV (River-rainfed mosaics)

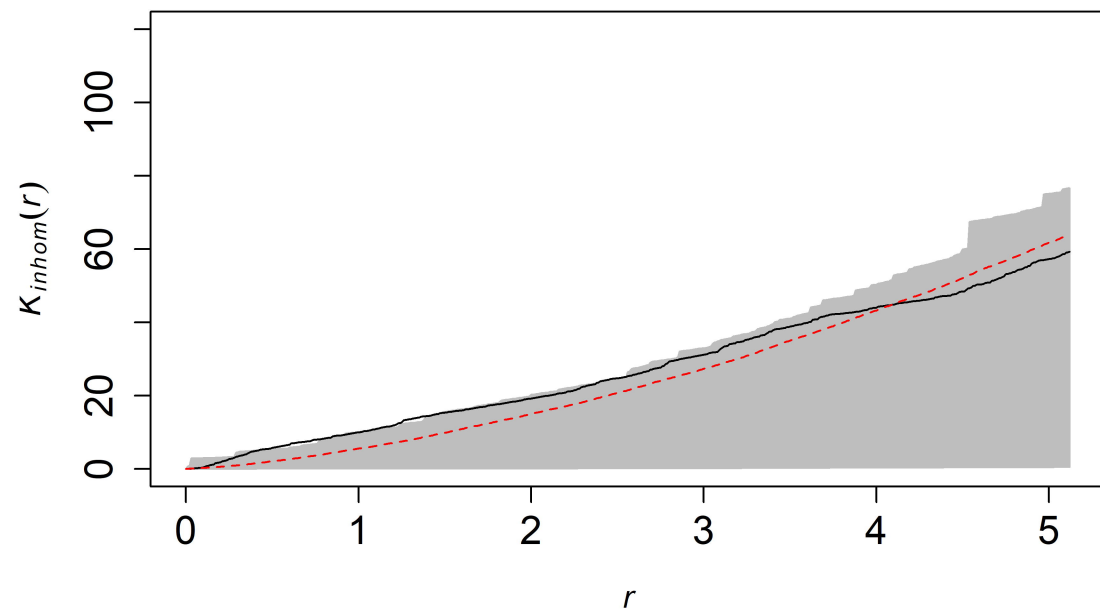

Source: https://www.medrxiv.org/content/10.1101/2021.09.07.21263238v1.full.pdf
